# Supplementary material for: When the Rule Becomes the Exception. No Evidence of Gene Flow between Two Zerynthia Cryptic Butterflies Suggests the Emergence of a New Model Group
Source: PLOS journal article supplement (doi:10.1371/journal.pone.0065746), 2013-06-06
Supplement: S3 (10.1371/journal.pone.0065746.s003) [file journal.pone.0065746.s003]

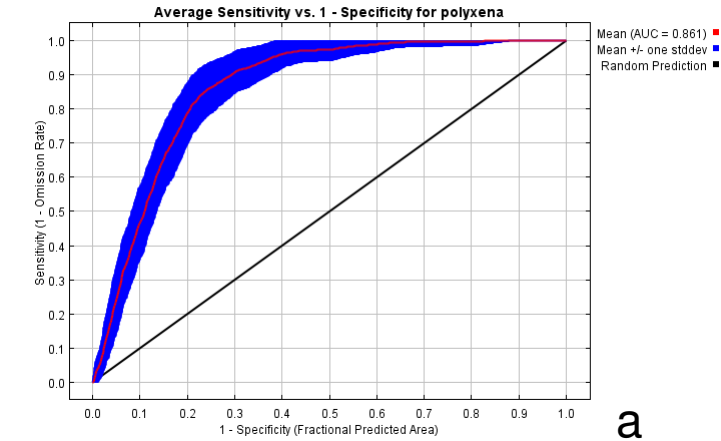

a

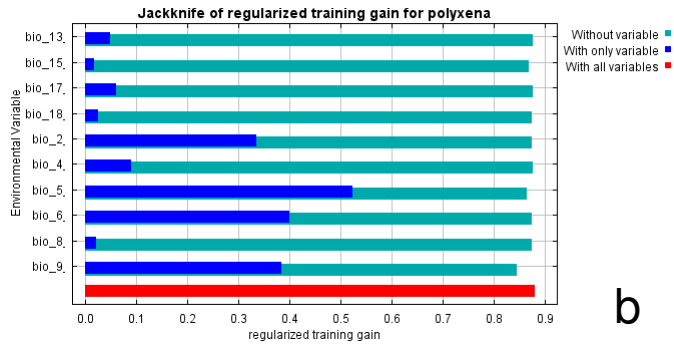

b

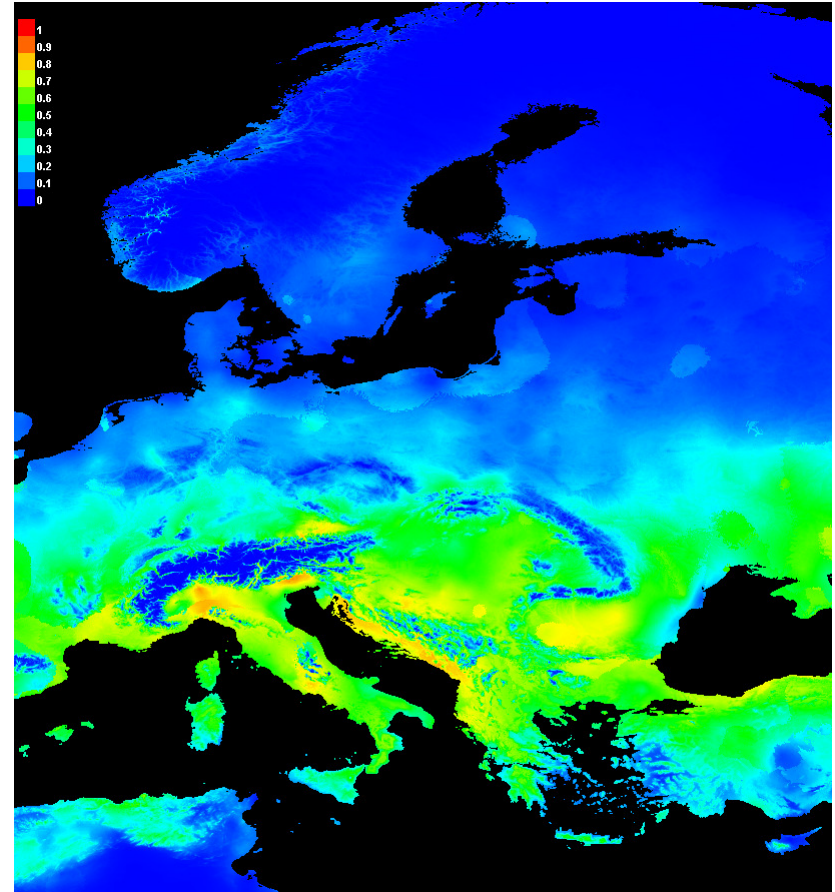

c

File S1. Supplementary results for the Maxent model of *Z. polyxena*, ROC curve (a); jackknife evaluation for the relative importance of BIOCLIM variables (b); logistic output for the entire study area (c).
